# Supplementary material for: Comparative Analysis of the Antimicrobial Activity of Essential Oils and Their Formulated Microemulsions against Foodborne Pathogens and Spoilage Bacteria
Source: MDPI journal article supplement (doi:10.3390/antibiotics11040447), 2022-03-25
Supplement: s1 [file s1]

## Supplementary Material

### **Comparative analysis of the antimicrobial activity of essential oils and their formulated microemulsions against foodborne pathogens and spoilage bacteria**

Raffaella Campana<sup>1\*</sup>, Mattia Tiboni<sup>1</sup>, Filippo Maggi<sup>2</sup>, Loredana Cappellacci<sup>2</sup>, Kevin Cianfaglione<sup>3</sup>,

Mohammad Reza Morshedloo<sup>4</sup>, Emanuela Frangipani<sup>1</sup>, Luca Casettari<sup>1</sup>

<sup>1</sup> Department of Biomolecular Science, University of Urbino, 61029 Urbino, Italy

<sup>2</sup> School of Pharmacy, University of Camerino, 62032 Camerino, Italy

<sup>3</sup> UMR UL/AgroParisTech/INRAE 1434 Silva, Université de Lorraine, Faculté des Sciences et Techniques - BP 70239 – 54506 Vandoeuvre-lès-Nancy, France

<sup>4</sup> Department of Horticultural Science, Faculty of Agriculture, University of Maragheh, Maragheh, 55136-553, Iran

\*Corresponding author:

Dr. Raffaella Campana, PhD,

Department of Biomolecular Sciences

Division of Pharmacology and Hygiene

Via S. Chiara 27, 61029 Urbino, Italy

Tel: +39 0722 303543

Fax: +39 0722 303541

e-mail: [raffaella.campana@uniurb.it](mailto:raffaella.campana@uniurb.it)

**Table S1.** Chemical composition of the essential oils investigated in this study by gas chromatography.

| Component                      | RI <sup>a</sup> | RI lit. <sup>b</sup> | (%) <sup>c</sup>          |              |              |              |              |              |               |              |             |                 |              |
|--------------------------------|-----------------|----------------------|---------------------------|--------------|--------------|--------------|--------------|--------------|---------------|--------------|-------------|-----------------|--------------|
|                                |                 |                      | <i>C.sa.</i> <sup>d</sup> | <i>C.ca.</i> | <i>C.ma.</i> | <i>C.cy.</i> | <i>C.le.</i> | <i>C.ar.</i> | <i>F.a.f.</i> | <i>F.gu.</i> | <i>J.co</i> | <i>J.pf.</i>    | <i>P.an.</i> |
| Bornylene                      | 904             | 907                  |                           |              |              |              |              |              |               |              |             | Tr <sup>e</sup> |              |
| Santolina triene               | 906             | 906                  |                           |              |              |              | Tr           |              |               |              |             |                 |              |
| Tricyclene                     | 919             | 921                  |                           |              |              |              | 0.1          | 0.3          |               |              | 0.1         | 2.3             |              |
| $\alpha$ -Thujene              | 921             | 924                  | 0.1                       |              | 0.4          | 0.2          | 0.9          | 0.7          |               | 5.0          | 3.7         | 0.4             |              |
| $\alpha$ -Pinene               | 926             | 932                  | 10.8                      | 0.7          | 6.4          | 0.5          | 16.7         | 41.0         | 0.2           | 10.6         | 32.8        | 2.1             |              |
| $\alpha$ -Fenchene             | 940             | 945                  |                           |              |              |              | 0.9          | 0.1          |               |              |             |                 |              |
| Camphene                       | 940             | 946                  | 0.1                       |              | Tr           | Tr           | 0.1          | 0.4          |               | 0.1          | 0.2         | 1.8             |              |
| Thuja-2,4(10)-diene            | 948             | 953                  |                           |              |              |              |              | 0.1          |               |              | 0.1         |                 |              |
| Sabinene                       | 969             | 969                  |                           |              | 6.0          | 0.5          | 10.4         | 2.7          |               | 2.1          | 22.1        | 5.4             |              |
| $\beta$ -Pinene                | 968             | 974                  | 4.0                       | 0.5          | 0.3          | 9.8          | 1.2          | 1.1          | 0.6           | 38.0         | 1.3         | 0.2             |              |
| 1-Octen-3-ol                   | 981             | 974                  |                           |              |              |              | 0.2          | Tr           |               |              | Tr          | Tr              |              |
| Myrcene                        | 990             | 988                  | 38.5                      |              | 0.5          | 0.6          | 2.6          | 3.6          | Tr            | 1.6          | 2.3         | 7.6             |              |
| 3-Octanol                      | 1001            | 991                  |                           |              |              |              |              |              |               |              |             |                 |              |
| $\delta$ -2-Carene             | 1002            | 1001                 |                           |              |              |              |              |              |               |              | 0.1         | 0.2             |              |
| $\alpha$ -Phellandrene         | 1003            | 1002                 | 0.5                       |              | Tr           | 0.2          | 0.1          | 0.1          |               | 0.4          | 0.6         | Tr              |              |
| $\delta$ -3-Carene             | 1008            | 1008                 | 0.2                       |              | Tr           | Tr           | 20.5         | 0.9          |               | Tr           | 0.1         |                 |              |
| $\alpha$ -Terpinene            | 1014            | 1014                 | 0.3                       |              | 0.7          | 0.1          | 2.1          | 0.9          |               | Tr           | 1.9         | 0.5             |              |
| 1- <i>p</i> -menthene          | 1020            | 1021                 |                           |              |              | Tr           |              |              |               |              |             |                 |              |
| <i>o</i> -Cymene               | 1022            | 1022                 |                           |              |              |              | Tr           |              |               |              |             |                 |              |
| <i>p</i> -Cymene               | 1023            | 1020                 |                           | 0.8          | 8.7          | 10.2         | 0.9          | 1.7          |               | 1.0          | 3.0         | 0.2             |              |
| Limonene                       | 1025            | 1024                 | 5.4                       | 46.7         | Tr           | 0.4          | 15.4         | 7.4          |               |              | Tr          | 6.9             |              |
| $\beta$ -Phellandrene          | 1026            | 1025                 |                           |              | 0.2          | 0.4          |              |              |               | 20.9         | 5.0         |                 |              |
| 1,8-Cineole                    | 1028            | 1026                 | 0.1                       |              |              | 0.2          |              | 1.1          |               |              |             |                 |              |
| ( <i>Z</i> )- $\beta$ -Ocimene | 1037            | 1032                 | 0.1                       |              | 1.0          |              |              | Tr           | 0.4           | 0.8          |             |                 |              |
| ( <i>E</i> )- $\beta$ -Ocimene | 1047            | 1044                 | 3.7                       |              |              |              |              | Tr           | 1.1           | 0.2          | 0.1         | 0.3             |              |
| $\gamma$ -Terpinene            | 1055            | 1054                 | 0.2                       |              | 32.9         | 12.2         | 3.5          | 1.4          |               | 0.2          | 3.3         | 0.9             |              |
| <i>cis</i> -Sabinene hydrate   | 1067            | 1065                 |                           |              | Tr           | Tr           | 0.7          | Tr           |               |              | 0.2         | 0.1             |              |
| <i>cis</i> -Linalool oxide     | 1073            | 1067                 |                           |              |              |              |              |              |               |              |             | Tr              |              |
| Butyl angelate                 | 1083            | 1085                 |                           |              |              |              | Tr           |              |               |              |             |                 |              |
| <i>p</i> -Mentha-2,4(8)-diene  | 1085            | 1085                 |                           |              |              |              | 0.1          |              |               |              |             |                 |              |
| Terpinolene                    | 1085            | 1086                 | 17.0                      |              | 0.2          | Tr           | 3.1          | 0.8          |               |              | 1.3         | 0.6             |              |
| 6-Camphenone                   | 1088            | 1095                 |                           |              |              |              |              |              |               |              | Tr          |                 |              |
| <i>p</i> -Cymenene             | 1091            | 1089                 |                           |              |              |              |              | 0.1          |               |              | 0.1         |                 |              |

|                                                    |      |      |     |     |     |     |      |     |     |
|----------------------------------------------------|------|------|-----|-----|-----|-----|------|-----|-----|
| 2-Nonanone                                         | 1097 | 1096 |     |     |     | Tr  |      |     |     |
| <i>trans</i> -Sabinene hydrate                     | 1098 | 1098 |     | 0.1 | 0.2 |     |      | 0.2 | Tr  |
| Linalool                                           | 1101 | 1095 | Tr  | Tr  | Tr  | 0.3 |      |     | 0.6 |
| Isopentyl isovalerate                              | 1106 | 1102 |     |     |     |     |      | 0.1 |     |
| 2-Methyl butyl isovalerate                         | 1110 | 1103 |     |     | 0.1 |     |      |     |     |
| <i>trans</i> -Thujone                              | 1116 | 1112 |     |     |     | Tr  |      | Tr  | 3.8 |
| <i>cis-p</i> -Menth-2-en-1-ol                      | 1121 | 1118 |     | Tr  | 0.4 | 0.1 |      | 0.3 | 0.1 |
| $\alpha$ -Campholenal                              | 1126 | 1122 |     |     | Tr  | 0.1 |      | 0.2 |     |
| <i>allo</i> -Ocimene                               | 1131 | 1128 | Tr  |     |     |     |      |     |     |
| <i>cis</i> -Limonene oxide                         | 1134 | 1132 |     |     | 0.1 |     |      |     |     |
| <i>iso</i> -3-Thujanol                             | 1135 | 1134 |     |     |     |     |      |     | 0.1 |
| <i>trans</i> -Pinocarveol                          | 1135 | 1135 |     | 0.1 |     | 0.2 |      | 0.4 |     |
| <i>trans</i> -Sabinol                              | 1135 | 1137 |     |     | Tr  |     |      |     | 2   |
| <i>trans</i> -Limonene oxide                       | 1138 | 1137 |     |     | Tr  | Tr  |      |     |     |
| <i>trans-p</i> -Menth-2-en-1-ol                    | 1139 | 1136 |     |     | 0.3 | 0.1 |      |     |     |
| Geijerene                                          | 1139 | 1138 |     |     |     |     |      |     | Tr  |
| <i>trans</i> -Verbenol                             | 1140 | 1140 |     |     |     |     |      | 0.3 |     |
| Camphor                                            | 1141 | 1141 |     |     | 0.1 | 1.9 |      |     | 0.2 |
| Camphene hydrate                                   | 1144 | 1145 |     |     |     | 0.1 |      |     | 0.3 |
| Citronellal                                        | 1156 | 1148 |     |     | 0.1 |     |      |     |     |
| Sabina ketone                                      | 1158 | 1154 |     |     |     | Tr  |      | 0.2 |     |
| Pinocarvone                                        | 1159 | 1160 |     | Tr  |     |     |      |     |     |
| Borneol                                            | 1165 | 1165 |     |     | 0.1 | 0.1 |      | 0.1 | 1.2 |
| ( <i>Z</i> )- <i>sec</i> -Butyl propenyl disulfide | 1166 | 1168 |     |     |     |     | 39.2 |     |     |
| <i>p</i> -Mentha-1,5-dien-8-ol                     | 1167 | 1168 |     |     | 0.1 | 0.2 |      | 0.3 |     |
| Coahuilensol                                       | 1171 | 1166 |     |     |     |     |      |     | 0.1 |
| ( <i>E</i> )- <i>sec</i> -Butyl propenyl disulfide | 1171 | 1174 |     |     |     |     | 26.3 |     |     |
| Umbellulone                                        | 1172 | 1167 |     |     | Tr  | 9   |      |     |     |
| Undeca-1,3,5-triene                                | 1173 | 1174 |     |     |     |     |      | 1.1 |     |
| Terpinen-4-ol                                      | 1175 | 1174 | 1.2 | 0.2 | 8.1 | 3.6 |      | 7.4 | 1.2 |
| <i>m</i> -Cymen-8-ol                               | 1184 | 1176 |     |     | Tr  |     |      |     |     |
| <i>p</i> -Cymen-8-ol                               | 1186 | 1179 | Tr  |     | 0.1 | 0.2 |      | 0.2 | Tr  |
| $\alpha$ -Terpineol                                | 1189 | 1186 | 0.1 | 0.1 | 0.4 | 1.1 |      | 0.6 | 0.1 |
| <i>p</i> -Menth-3-en-7-al                          | 1191 | 1195 |     | 0.7 |     |     |      |     |     |
| <i>cis</i> -Piperitol                              | 1194 | 1195 |     |     | 0.1 | Tr  |      |     |     |
| Myrtenal                                           | 1190 | 1195 |     |     |     |     |      | 0.1 |     |

|                                                    |      |      |      |      |      |     |     |     |     |     |      |
|----------------------------------------------------|------|------|------|------|------|-----|-----|-----|-----|-----|------|
| Myrtenol                                           | 1194 | 1194 |      |      | 0.1  |     | 0.1 |     | 0.3 |     |      |
| Methyl chavicol                                    | 1199 | 1195 |      |      |      |     |     |     |     |     | 1.6  |
| <i>trans</i> -Piperitol                            | 1207 | 1207 |      |      |      | 0.1 | Tr  |     | 0.2 | Tr  |      |
| Verbenone                                          | 1208 | 1204 |      |      |      |     | Tr  |     | 0.2 |     |      |
| <i>di-sec</i> -Butyl disulfide                     | 1209 | 1212 |      |      |      |     |     | 0.8 |     |     |      |
| <i>endo</i> -Fenchyl acetate                       | 1218 | 1218 |      |      |      | 0.2 |     |     |     |     |      |
| <i>trans</i> -Carveol                              | 1219 | 1215 |      |      |      |     | 0.1 |     | Tr  |     |      |
| Coahuilensol. methyl ether                         | 1224 | 1219 |      |      |      |     |     |     |     |     | 0.2  |
| Citronellol                                        | 1233 | 1223 |      |      |      | 0.3 | 0.8 |     |     |     | 0.1  |
| Thymol. methyl ether                               | 1233 | 1232 |      | 0.3  |      | Tr  | 0.1 |     | 0.2 |     |      |
| Cumin aldehyde                                     | 1238 | 1238 | 2.9  |      | 30.2 |     |     |     |     | Tr  |      |
| Carvacrol, methyl ether                            | 1239 | 1241 |      | 21.9 |      |     | Tr  |     | 0.1 | Tr  |      |
| Carvone                                            | 1241 | 1239 | 38.4 |      |      |     | Tr  |     |     |     |      |
| Disulfide, 2-butenyl 1-methylpropyl, ( <i>E</i> )- | 1249 | 1257 |      |      |      |     |     | 0.2 |     |     |      |
| Disulfide, methyl 1-(methylthio)propyl             | 1251 | 1265 |      |      |      |     |     | 0.1 |     |     |      |
| (4 <i>Z</i> )-Decen-1-ol                           | 1261 | 1255 |      |      |      |     | 0.1 |     |     |     |      |
| Piperitone                                         | 1253 | 1249 |      |      |      | 0.1 | 0.1 |     |     |     | Tr   |
| Methyl citronellate                                | 1265 | 1257 |      |      |      |     |     |     |     |     | 0.4  |
| <i>trans</i> -Ascaridol glycol                     | 1265 | 1266 |      |      |      |     |     |     |     | Tr  |      |
| <i>trans-p</i> -Menth-2-en-7-ol                    | 1266 | 1268 |      |      | 0.2  |     |     |     |     |     |      |
| Isopulegyl acetate                                 | 1276 | 1275 |      |      |      | Tr  |     |     |     |     |      |
| $\alpha$ -terpinen-7-al                            | 1278 | 1283 |      |      |      |     |     |     |     | Tr  |      |
| <i>neoiso</i> -3-Thujanol acetate                  | 1279 | 1281 |      |      |      |     |     |     |     |     | Tr   |
| ( <i>E</i> )-Anethole                              | 1284 | 1282 | 3.5  |      | 0.1  |     |     |     |     |     | 96.7 |
| Bornyl acetate                                     | 1285 | 1287 |      | 0.1  |      | 0.2 | 0.4 |     | 0.1 | 0.3 | 36.3 |
| $\gamma$ -Terpinen-7-al                            | 1287 | 1290 |      |      | 17.3 |     |     |     |     |     |      |
| <i>p</i> -Cymen-7-ol                               | 1289 | 1289 |      |      | 2.4  |     |     |     |     |     |      |
| <i>trans</i> -Sabinyol acetate                     | 1294 | 1289 |      |      |      |     |     |     | 0.1 |     | 18.2 |
| Lavandulyl acetate                                 | 1295 | 1288 |      |      |      |     |     | 0.1 |     |     |      |
| Thymol                                             | 1298 | 1289 |      | 0.1  | 0.1  |     |     |     |     |     |      |
| <i>trans</i> -Pinocarvyl acetate                   | 1298 | 1298 |      |      |      |     |     | 0.2 |     |     |      |
| Terpinen-4-ol acetate                              | 1299 | 1299 |      |      |      | 0.5 | 0.3 |     |     | 0.1 |      |
| Carvacrol                                          | 1302 | 1298 |      | Tr   | Tr   |     |     |     |     |     |      |
| Methyl geranate                                    | 1327 | 1322 |      |      |      |     |     |     |     |     | Tr   |
| <i>p</i> -Mentha-1,4-dien-7-ol                     | 1328 | 1325 |      |      | 0.8  |     |     |     |     |     |      |
| <i>trans</i> -Carvyl acetate                       | 1339 | 1339 |      |      |      |     | Tr  |     |     |     |      |

|                                                                  |      |                   |      |     |     |     |     |      |     |     |     |
|------------------------------------------------------------------|------|-------------------|------|-----|-----|-----|-----|------|-----|-----|-----|
| $\alpha$ -Terpinyl acetate                                       | 1344 | 1346              |      |     |     | 3.2 | 0.6 |      | 0.1 | 2.2 |     |
| $\alpha$ -Cubebene                                               | 1346 | 1345              |      |     |     | 0.3 | Tr  |      |     | 0.1 | Tr  |
| $\alpha$ -Copaene                                                | 1366 | 1374              |      |     |     | 0.1 |     |      | 0.3 | 0.1 | Tr  |
| Daucene                                                          | 1373 | 1380              |      | 0.1 |     |     |     |      |     |     |     |
| $\beta$ -Cubebene                                                | 1381 | 1387              |      |     |     |     |     |      | 0.1 | Tr  | Tr  |
| $\beta$ -Elemene                                                 | 1383 | 1389              |      |     |     | 0.1 |     |      | 0.4 | 0.6 |     |
| Sibirene                                                         | 1392 | 1400              |      |     |     |     |     |      |     | 0.3 |     |
| Longifolene                                                      | 1394 | 1407              |      |     |     |     | Tr  |      |     |     | Tr  |
| ( <i>E</i> )-Caryophyllene                                       | 1407 | 1417              | 14.7 |     | Tr  | Tr  | 0.2 |      | 0.5 | 0.2 | Tr  |
| Methyl eugenol                                                   | 1408 | 1403              |      |     |     |     | Tr  |      |     |     |     |
| $\beta$ -Copaene                                                 | 1418 | 1430              |      |     |     |     |     |      |     | Tr  |     |
| 2,5-Dimethoxy- <i>p</i> -cymene                                  | 1421 | 1424              |      |     |     |     |     |      | 0.2 |     |     |
| <i>cis</i> -Thujopsene                                           | 1421 | 1429              |      |     |     |     | 0.1 |      |     |     |     |
| <i>Z</i> -Propenyl- <i>sec</i> -butyl trisulphide                | 1421 | 1433 <sup>f</sup> |      |     |     |     |     | 17.0 |     |     |     |
| <i>E</i> -Propenyl- <i>sec</i> -butyl trisulphide                | 1424 | 1435 <sup>f</sup> |      |     |     |     |     | 6.1  |     |     |     |
| $\gamma$ -Elemene                                                | 1430 | 1434              |      |     |     | Tr  |     |      |     | 0.4 |     |
| $\alpha$ - <i>trans</i> -Bergamotene                             | 1431 | 1432              |      |     | Tr  |     |     |      |     |     |     |
| <i>cis</i> -Muurolo-3,5-diene                                    | 1440 | 1448              |      |     |     | Tr  | 2.7 |      |     | Tr  | Tr  |
| $\alpha$ -Humulene                                               | 1440 | 1452              | 3.9  |     |     |     | 0.1 | 0.1  | 0.1 | 0.3 | Tr  |
| <i>trans</i> -Muurolo-3,5-diene                                  | 1443 | 1451              |      |     |     |     |     |      |     |     | Tr  |
| <i>cis</i> -Cadina-1(6),4-diene                                  | 1456 | 1461              |      |     |     | Tr  | 6.4 |      |     |     |     |
| ( <i>E</i> )- $\beta$ -Farnesene                                 | 1458 | 1454              |      | Tr  | 0.1 |     |     |      | Tr  |     |     |
| <i>cis</i> -Muurolo-4(14),5-diene                                | 1461 | 1465              |      |     | Tr  | 1.2 |     |      |     |     |     |
| <i>E</i> and <i>Z</i> -Propenyl-1-(methylthio) propyl disulphide | 1462 | 1465              |      |     |     |     |     | 0.9  |     |     |     |
| $\beta$ -Acoradiene                                              | 1466 | 1469              |      |     | 0.1 |     |     |      |     |     |     |
| <i>trans</i> -Cadina-1(6),4-diene                                | 1468 | 1475              |      |     |     |     |     |      |     | Tr  | 0.1 |
| $\gamma$ -Muuroloene                                             | 1471 | 1478              |      |     |     |     |     |      |     | Tr  | 0.1 |
| Germacrene D                                                     | 1468 | 1484              |      |     |     |     |     |      | 0.6 | 0.9 | 0.2 |
| $\gamma$ -Himachalene                                            | 1471 | 1481              |      |     |     |     |     |      |     |     | 0.6 |
| $\beta$ -Selinene                                                | 1474 | 1489              |      |     |     |     |     |      |     | 0.1 |     |
| <i>ar</i> -Curcumene                                             | 1481 | 1478              |      |     |     | 0.1 | Tr  |      |     | 0.3 |     |
| <i>trans</i> -Muurolo-4(14),5-diene                              | 1483 | 1493              |      |     |     |     |     |      |     | 0.1 | 0.1 |
| Epishyobunone                                                    | 1483 | 1497              |      |     |     |     |     |      | 1.7 |     |     |
| $\alpha$ -Selinene                                               | 1484 | 1498              |      |     |     |     |     |      |     | 0.1 |     |
| $\beta$ -Alaskene                                                | 1489 | 1498              |      |     |     |     | Tr  |      |     |     |     |

|                                           |      |      |     |      |     |     |     |     |
|-------------------------------------------|------|------|-----|------|-----|-----|-----|-----|
| Bicyclogermacrene                         | 1490 | 1500 |     |      | 0.1 |     | 0.2 |     |
| $\alpha$ -Muurolene                       | 1490 | 1500 |     |      | Tr  |     | 0.1 | 0.1 |
| Epizonarene                               | 1494 | 1501 |     |      |     | 1.6 |     | 0.2 |
| $\alpha$ -Zingiberene                     | 1495 | 1493 |     | Tr   |     |     |     | 0.1 |
| Shyobunone                                | 1504 | 1500 |     |      |     |     | 3.8 |     |
| $\alpha$ -Alaskene                        | 1507 | 1512 |     |      | 0.1 | 0.1 |     |     |
| $\gamma$ -Cadinene                        | 1508 | 1513 |     |      |     |     | 0.2 | 0.8 |
| $\beta$ -Curcumene                        | 1510 | 1514 |     |      | 0.1 |     |     | 0.3 |
| Kessane                                   | 1513 | 1529 |     |      |     |     | 2.8 |     |
| $\delta$ -Cadinene                        | 1513 | 1522 |     |      | 0.2 | 0.5 | 3   | 0.9 |
| <i>trans</i> -Calamenene                  | 1516 | 1521 |     |      |     | 0.8 |     | 1.5 |
| Myristicin                                | 1521 | 1517 |     | 0.5  |     |     |     |     |
| 10- <i>epi</i> -Cubebol                   | 1524 | 1533 |     |      |     | Tr  |     |     |
| <i>trans</i> -Cadina-1,4-diene            | 1526 | 1533 |     |      |     |     | Tr  | Tr  |
| $\alpha$ -Cadinene                        | 1532 | 1537 |     |      |     |     |     | Tr  |
| $\alpha$ -Calacorene                      | 1536 | 1542 |     |      |     | 0.1 |     |     |
| <i>cis</i> -Muurol-5-en-4- $\beta$ -ol    | 1540 | 1550 |     |      |     | 0.1 |     |     |
| Elemol                                    | 1545 | 1548 |     |      | 0.1 |     |     | 1   |
| <i>trans</i> -Muurol-5-en-4- $\alpha$ -ol | 1549 | 1559 |     |      |     | 0.2 |     |     |
| Germacrene B                              | 1550 | 1559 |     | Tr   | Tr  |     | 0.5 |     |
| Elemicin                                  | 1563 | 1555 |     | 0.1  |     |     |     |     |
| ( <i>E</i> )-Nerolidol                    | 1663 | 1561 |     |      | 0.1 |     |     |     |
| Germacrene D-4-ol                         | 1563 | 1574 |     |      |     |     | 0.2 | 0.1 |
| Spathulenol                               | 1565 | 1577 |     |      |     |     |     | 0.6 |
| Caryophyllene oxide                       | 1572 | 1583 |     | Tr   |     | 0.1 |     | 0.1 |
| Salvial-4(14)-en-1-one                    | 1581 | 1594 |     |      |     |     | Tr  |     |
| Carotol                                   | 1586 | 1594 |     | 0.1  |     |     |     |     |
| Cedrol                                    | 1589 | 1600 |     |      | Tr  | 0.1 |     |     |
| Humulene epoxide II                       | 1599 | 1608 |     |      |     | 0.1 |     | 0.1 |
| $\beta$ -Oplopenone                       | 1601 | 1607 |     |      |     |     |     | 0.1 |
| 1,10- <i>di-epi</i> -Cubenol              | 1607 | 1618 |     |      |     | 0.1 |     |     |
| 1- <i>epi</i> -Cubenol                    | 1621 | 1628 |     |      |     |     | 0.1 | 0.1 |
| $\alpha$ -Acorenol                        | 1621 | 1632 |     |      |     | 0.5 |     |     |
| Dill apiole                               | 1623 | 1620 | 3.3 | 17.5 |     |     |     |     |
| $\beta$ -Acorenol                         | 1626 | 1636 |     |      |     | 0.1 |     |     |
| <i>epi</i> - $\alpha$ -Cadinol            | 1629 | 1638 |     |      | Tr  | 0.2 | 0.1 | 0.2 |
| <i>epi</i> - $\alpha$ -Muurolol           | 1635 | 1640 |     |      | Tr  |     | Tr  | 0.2 |

|                                                |      |      |  |     |     |  |  |     |     |  |  |     |
|------------------------------------------------|------|------|--|-----|-----|--|--|-----|-----|--|--|-----|
| $\beta$ -Eudesmol                              | 1641 | 1649 |  |     |     |  |  |     |     |  |  | 0.1 |
| $\alpha$ -Cadinol                              | 1642 | 1652 |  | Tr  | 0.3 |  |  | Tr  | 0.1 |  |  | 0.3 |
| Shyobunol                                      | 1674 | 1688 |  |     |     |  |  | 0.3 |     |  |  |     |
| <i>cis</i> -14- <i>nor</i> -Muuro-5-en-4-one   | 1676 | 1688 |  |     | 0.3 |  |  |     |     |  |  |     |
| <i>epi</i> - $\alpha$ -bisabolol               | 1682 | 1683 |  | 0.2 |     |  |  |     |     |  |  |     |
| Germacre-4(15),5,10(14)-trien-1- $\alpha$ -ol  | 1694 | 1685 |  | 0.1 |     |  |  |     |     |  |  |     |
| ( <i>Z</i> )-Nuciferol                         | 1722 | 1724 |  | Tr  | 0.1 |  |  |     |     |  |  |     |
| $\beta$ -( <i>Z</i> )-Curcumen-12-ol           | 1755 | 1754 |  | Tr  |     |  |  |     |     |  |  |     |
| ( <i>E</i> )-pseudoisoeugenyl 2-methylbutyrate | 1844 | 1841 |  |     |     |  |  |     |     |  |  | 0.4 |
| Isohibaene                                     | 1905 | 1933 |  | Tr  |     |  |  |     |     |  |  |     |
| Isophyllocladene                               | 1944 | 1966 |  | 0.1 |     |  |  |     |     |  |  |     |
| Manool oxide                                   | 1974 | 1987 |  | 0.2 |     |  |  |     |     |  |  |     |
| 13- <i>epi</i> -Manool oxide                   | 1995 | 2009 |  | Tr  |     |  |  |     |     |  |  |     |
| Nezukol                                        | 2091 | 2132 |  | 0.8 | 0.3 |  |  |     |     |  |  |     |
| Phyllocladanol                                 | 2172 | 2209 |  | 0.1 |     |  |  |     |     |  |  |     |

|                      |      |      |      |      |      |      |      |      |      |      |      |
|----------------------|------|------|------|------|------|------|------|------|------|------|------|
| Total identified (%) | 99.8 | 97.1 | 99.3 | 99.6 | 98.7 | 99.4 | 93.2 | 97.1 | 99.3 | 99.6 | 99.4 |
|----------------------|------|------|------|------|------|------|------|------|------|------|------|

<sup>a</sup> Linear retention index calculated on a HP-5MS column (30 m x 0.25 mm, 0.1  $\mu$ m f.t.) using a mixture of *n*-alkanes C<sub>7</sub>-C<sub>30</sub> (Supelco, Bellefonte, CA). <sup>b</sup> Retention index value taken from Adams (2007) or NIST 17. <sup>c</sup> Relative percentage values as a mean of three measurements (RSD% in all cases in the range 2-20%). <sup>d</sup> C.sa, *Cannabis sativa*; C.ca., *Carum carvi*; C.ma., *Crithmum maritimum*; C.cy., *Cuminum cyminum*; C.le, *Cupressocypariss leylandii*; C.ar., *Cupressus arizonica*; F.a.f., *Ferula assa-foetida*; F.gu., *Ferula gummosa*; J.co., *Juniperus communis*; J.pf., *Juniperus x pfitzeriana*; P.an., *Pimpinella anisum*. <sup>e</sup> Tr, traces, % < 0.1. <sup>f</sup> Comparison with data of Kasaian et al. (2016).

## References

- Adams R (2007) Identification of Essential Oil Components by Gas Chromatography/ Mass Spectrometry, 4th ed. Allured Publishing Corp., Carol Stream, IL, USA.
- Kasaian J, Asili J, Iranshahi M (2016) Sulphur-containing compounds in the essential oil of *Ferula alliacea* roots and their mass spectral fragmentation patterns. Pharm Biol 54:2264–2268.
- NIST 17 (2017) Mass Spectral Library (NIST/EPA/NIH). National Institute of Standards and Technology, Gaithersburg, USA.
